# Supplementary material
Source: ML conference proceedings conference paper supplement (https://openreview.net/forum?id=vIDBSGl3vzl)
Supplement: supplementary_material [file attachment]

## A Appendix

### A.1 Proofs

*Proof of Lemma 3.2* ( $\underline{\mathcal{B}}^*$  is a  $\gamma$ -contraction in  $\infty$ -norm). First observe that for any functions  $f$  and  $g$ ,

$$|\max_x f(x) - \max_x g(x)| \leq \max_x |f(x) - g(x)| \quad (14)$$

To see this, suppose  $\max_x f(x) > \max_x g(x)$  (the other case is symmetric) and let  $\tilde{x} = \arg \max_x f(x)$ . Then

$$|\max_x f(x) - \max_x g(x)| = f(\tilde{x}) - \max_x g(x) \leq f(\tilde{x}) - g(\tilde{x}) \leq \max_x |f(x) - g(x)| \quad (15)$$

We also note that (14) implies

$$|\min_x f(x) - \min_x g(x)| \leq \max_x |f(x) - g(x)| \quad (16)$$

since  $\min_x f(x) = -\max_x (-f(x))$ . Thus for any  $Q, Q' : \mathcal{S} \times \mathcal{A} \rightarrow \mathbb{R}$ ,

$$\begin{aligned} \|\underline{\mathcal{B}}^* Q - \underline{\mathcal{B}}^* Q'\|_\infty &= \sup_{s,a} |\underline{\mathcal{B}}^* Q(s,a) - \underline{\mathcal{B}}^* Q'(s,a)| \\ &= \gamma \sup_{s,a} \left| \min_{s' \in \hat{T}(s,a)} \max_{a'} Q(s',a') - \min_{s' \in \hat{T}(s,a)} \max_{a'} Q'(s',a') \right| \\ &\leq \gamma \sup_{s,a} \max_{s' \in \hat{T}(s,a)} \left| \max_{a'} Q(s',a') - \max_{a'} Q'(s',a') \right| \\ &\leq \gamma \sup_{s',a'} |Q(s',a') - Q'(s',a')| \\ &= \gamma \|Q - Q'\|_\infty \end{aligned}$$

Hence  $\underline{\mathcal{B}}^*$  is indeed a  $\gamma$ -contraction.  $\square$

### A.2 Extension to stochastic dynamics

Here we outline a possible extension to stochastic dynamics, although we leave experiments with stochastic systems for future work.

First, let us modify the definitions to accommodate stochastic dynamics:

- We introduce safety functions  $\mu^\pi(s, a) = \mathbb{E}^\pi[\sum_t \text{Unsafe}(s_t) \mid s_0 = s, a_0 = a]$ , i.e.  $Q^\pi$  where the cost is the Unsafe indicator and  $\gamma = 1$ . Note that if an unsafe state is reached, the episode terminates, so the sum is always 0 or 1. In words,  $\mu^\pi(s, a)$  is the probability of ever encountering an unsafe state if the agent starts from state  $s$ , takes action  $a$ , and then follows  $\pi$  thereafter. Similarly, let  $\nu^\pi(s) = \mathbb{E}_{a \sim \pi(s)}[\mu^\pi(s, a)]$ , analogous to  $V^\pi$ .
- We also define the optimal safety functions  $\mu^*(s, a) = \min_\pi \mu^\pi(s, a)$  and  $\nu^*(s) = \min_\pi \nu^\pi(s)$ .
- A state-action pair  $(s, a)$  is  $p$ -irrecoverable if  $\mu^*(s, a) \geq p$ . Otherwise we say that  $(s, a)$  is  $p$ -safe.
- A state  $s$  is  $p$ -irrecoverable if  $\nu^*(s) \geq p$ , and  $p$ -safe otherwise.

Our rapid failure assumption must also be extended: There exists a horizon  $H$  and threshold  $q$  such that if  $(s, a)$  is  $p$ -irrecoverable, then for any sequence of actions  $\{a_t\}_{t=0}^\infty$  with  $a_0 = a$ , the probability of encountering an unsafe state within  $H$  steps is at least  $q$ . (Note that necessarily  $q \leq p$ .)

#### A.2.1 Analysis

Let  $s$  be a  $p$ -safe state, and let  $a$  and  $a'$  be actions where  $a$  is  $p$ -safe but  $a'$  is  $p$ -irrecoverable<sup>4</sup>. We want to have  $\tilde{Q}^*(s, a) > \tilde{Q}^*(s, a')$  so that the greedy policy w.r.t.  $\tilde{Q}^*$ , which is an optimal policy for

<sup>4</sup>Note that, as a consequence of the definitions, any action which is  $p'$ -safe with  $p' < p$  is also  $p$ -safe, and similarly any action which is  $p'$ -irrecoverable with  $p' > p$  is also  $p$ -irrecoverable.

$\widetilde{M}$ , will only take  $p$ -safe actions. Our strategy is to bound  $\widetilde{Q}^*(s, a')$  from above and  $\widetilde{Q}^*(s, a)$  from below, then choose  $C$  to make the desired inequality hold.

We consider  $a'$  first, breaking it down into two cases:

- An unsafe state is reached within  $H$  steps. Since  $(s, a')$  is  $p$ -irrecoverable, our assumption implies that an unsafe state is reached within  $H$  steps with probability at least  $q$ . As calculated in the original submission, the maximum return of a trajectory which is unsafe within  $H$  steps is at most  $\frac{r_{\max}(1-\gamma^H)-C\gamma^H}{1-\gamma}$ . Let us call this constant  $R_C$ . If  $R_C < 0$ , then

$$\mathbb{P}(\text{unsafe within } H \text{ steps}) \cdot (\text{max return} \mid \text{unsafe within } H \text{ steps}) \leq qR_C \quad (17)$$

Otherwise, we can use the fact that any probability is bounded by 1 to obtain

$$\mathbb{P}(\text{unsafe within } H \text{ steps}) \cdot (\text{max return} \mid \text{unsafe within } H \text{ steps}) \leq R_C \quad (18)$$

To satisfy both simultaneously, we can use the bound  $\max\{qR_C, R_C\}$ .

- The next  $H$  states encountered are all safe. This happens with probability less than  $1 - q$ , and the maximal return is  $\frac{r_{\max}}{1-\gamma}$  as usual.

From the reasoning above, we obtain

$$\widetilde{Q}^*(s, a') \leq \mathbb{P}(\text{unsafe within } H \text{ steps}) \cdot (\text{max return} \mid \text{unsafe within } H \text{ steps}) + \quad (19)$$

$$\mathbb{P}(\text{safe for } H \text{ steps}) \cdot (\text{max return} \mid \text{safe for } H \text{ steps}) \quad (20)$$

$$\leq \max\{qR_C, R_C\} + (1 - q) \frac{r_{\max}}{1 - \gamma} \quad (21)$$

Now consider  $a$ . Since  $(s, a)$  is  $p$ -safe,

$$\widetilde{Q}^*(s, a) \geq \mathbb{P}(\text{unsafe}) \cdot (\text{min reward} \mid \text{unsafe}) + \mathbb{P}(\text{safe}) \cdot (\text{min reward} \mid \text{safe}) \quad (22)$$

$$\geq p \left( \frac{-C}{1 - \gamma} \right) + (1 - p) \frac{r_{\min}}{1 - \gamma} \quad (23)$$

$$= \frac{-pC + (1 - p)r_{\min}}{1 - \gamma} \quad (24)$$

Note that the second step assumes  $C \geq 0$ . (We will enforce this constraint when choosing  $C$ .)

To ensure  $\widetilde{Q}^*(s, a) > \widetilde{Q}^*(s, a')$ , it suffices to choose  $C$  so that the following inequalities hold simultaneously:

$$\frac{-pC + (1 - p)r_{\min}}{1 - \gamma} > qR_C + (1 - q) \frac{r_{\max}}{1 - \gamma} \quad (25)$$

$$\frac{-pC + (1 - p)r_{\min}}{1 - \gamma} > R_C + (1 - q) \frac{r_{\max}}{1 - \gamma} \quad (26)$$

Multiplying both sides of (25) by  $1 - \gamma$  gives the equivalent

$$-pC + (1 - p)r_{\min} > qr_{\max}(1 - \gamma^H) - qC\gamma^H + (1 - q)r_{\max} \quad (27)$$

Rearranging, we need

$$C > \frac{r_{\max}(1 - q\gamma^H) - (1 - p)r_{\min}}{q\gamma^H - p} =: \alpha_1 \quad (28)$$

Similarly, multiplying both sides of (26) by  $1 - \gamma$  gives the equivalent

$$-pC + (1 - p)r_{\min} > r_{\max}(1 - \gamma^H) - C\gamma^H + (1 - q)r_{\max} \quad (29)$$

Rearranging, we need

$$C > \frac{r_{\max}(2 - q - \gamma^H) - (1 - p)r_{\min}}{\gamma^H - p} =: \alpha_2 \quad (30)$$

All things considered, the inequality  $\widetilde{Q}^*(s, a) > \widetilde{Q}^*(s, a')$  holds if we set

$$C > \max\{\alpha_1, \alpha_2, 0\} \quad (31)$$

### A.3 Implementation details and hyperparameters

In this appendix we provide additional details regarding the algorithmic implementation, including hyperparameter selection.

Here are some additional details regarding the (S)MBPO implementation:

- All neural networks are implemented in PyTorch [Paszke et al., 2019] and optimized using the Adam optimizer [Kingma and Ba, 2014] and batch size 256.
- The dynamics models use a branched architecture, where a shared trunk computes an intermediate value  $z = h_{\theta_1}([s, a])$  which is then passed to branches  $\mu_{\theta_2}(z)$  and  $\sigma_{\theta_3}(z)$ . All three networks are implemented as multi-layer perceptrons (MLPs) with ReLU activation and 200 hidden width. The  $h_{\theta}$  network has 3 layers (with ReLU on the final layer too), while  $\mu_{\theta_2}$  and  $\sigma_{\theta_3}$  each have one hidden layer (no ReLU on final layer).
- Every 250 environment steps, we update the dynamics models, taking 2000 updates of the Adam optimizer.
- The networks for the Q functions and policies all have two hidden layers of width 256.
- We use a learning rate of 3e-4 for the Q function, 1e-4 for the policy, and 1e-3 for the model.
- Following Fujimoto et al. [2018], we store two copies of the weights for  $Q$  (and  $\bar{Q}$ ), trained the same way but with different initializations. When computing the target  $\bar{Q}$  in equation (10) and when computing  $Q$  in equation (13), we take the minimum of the two copies' predictions. When computing the  $Q$  in equation (10), we compute the loss for both copies of the weights and add the two losses.
- When sampling batches of data from  $\mathcal{D} \cup \hat{\mathcal{D}}$ , we take 10% of the samples from  $\mathcal{D}$  and the remainder from  $\hat{\mathcal{D}}$ .

The model-free algorithms have their own hyperparameters, but all share  $\gamma_{\text{safe}}$  and  $\epsilon_{\text{safe}}$ . Following Thananjeyan et al. [2020], we tune  $\gamma_{\text{safe}}$  and  $\epsilon_{\text{safe}}$  for recovery RL first, then hold those fixed for all algorithms and tune any remaining algorithm-specific hyperparameters. All these hyperparameters are given in the tables below:

| Name                     | Which algorithm(s)? | Choices          | hopper | cheetah | ant | humanoid |
|--------------------------|---------------------|------------------|--------|---------|-----|----------|
| $\gamma_{\text{safe}}$   | all                 | 0.5, 0.6, 0.7    | 0.6    | 0.5     | 0.6 | 0.6      |
| $\epsilon_{\text{safe}}$ | all                 | 0.2, 0.3, 0.4    | 0.3    | 0.2     | 0.2 | 0.4      |
| $\nu$                    | LR                  | 1, 10, 100, 1000 | 1000   | 1000    | 1   | 1        |
| $\nu$                    | SQRL                | 1, 10, 100, 1000 | 1      | 1000    | 10  | 1        |
| $\lambda$                | RCPO                | 1, 10, 100, 1000 | 10     | 10      | 1   | 10       |

We run our experiments using a combination of NVIDIA GeForce GTX 1080 Ti, TITAN Xp, and TITAN RTX GPUs from our internal cluster. A single run of (S)MBPO takes as long as 72 hours on a single GPU.
